# Supplementary material
Source: Springer Nature journal article supplement (https://www.springermedizin.de/resource/supplementary/13601_2014_891_MOESM4_ESM.pdf/9678592)

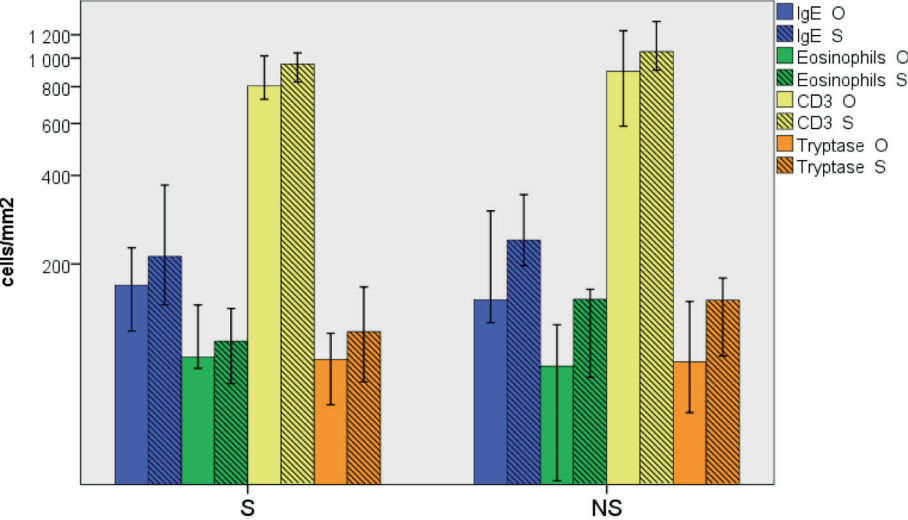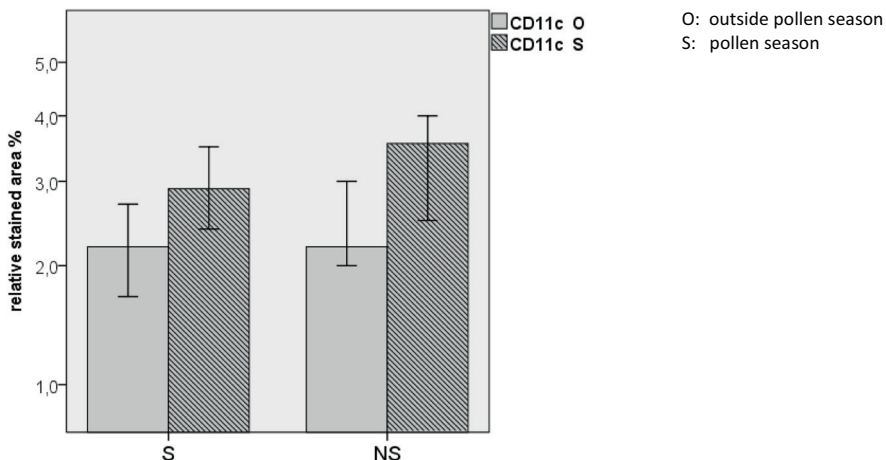

Supplement: MOESM4 [file 9678592]
